# Supplementary material
Source: Research Square preprint supplement (doi:10.21203/rs.3.rs-9630329/v1)
Supplement: Supplementary file 1 [file a04f77e55663b68c6b51db7e.docx]

**Rethinking health governance in fragile, multi-jurisdictional settings: a scoping review of the literature with significance for Somalia**

**Annex 1**: Full search strings by database

|  |  |
| --- | --- |
| Scopus  2010-2025 | ( TITLE-ABS-KEY ( "health governance" ) OR TITLE-ABS-KEY ( "health system governance" ) OR TITLE-ABS-KEY ( "health service delivery" ) OR TITLE-ABS-KEY ( "healthcare delivery" ) OR TITLE-ABS-KEY ( ( "care coordination" OR "service coordination" OR coordinat* OR harmoniz* OR harmonis* OR integrat* OR "integrated care" OR "service integration" ) AND ( health OR care OR service* OR delivery OR governance ) ) ) AND ( TITLE-ABS-KEY ( "fragile state" ) OR TITLE-ABS-KEY ( "fragile setting" ) OR TITLE-ABS-KEY ( "conflict-affected" ) OR TITLE-ABS-KEY ( conflict ) OR TITLE-ABS-KEY ( devolved ) OR TITLE-ABS-KEY ( federalized ) OR TITLE-ABS-KEY ( federalis* ) ) AND ( TITLE-ABS-KEY ( Comoros ) OR TITLE-ABS-KEY ( Ethiopia ) OR TITLE-ABS-KEY ( Iraq ) OR TITLE-ABS-KEY ( Libya ) OR TITLE-ABS-KEY ( Nepal ) OR TITLE-ABS-KEY ( Nigeria ) OR TITLE-ABS-KEY ( "Papua New Guinea" ) OR TITLE-ABS-KEY ( Somalia ) OR TITLE-ABS-KEY ( Syria ) OR TITLE-ABS-KEY ( Venezuela ) OR TITLE-ABS-KEY ( Palestine ) OR TITLE-ABS-KEY ( Yemen ) OR TITLE-ABS-KEY ( Kenya ) OR TITLE-ABS-KEY ( Myanmar ) OR TITLE-ABS-KEY ( Micronesia ) ) AND PUBYEAR > 2009 AND PUBYEAR < 2026 |
| PubMed  2010-2025 | ( "Health Governance"[Mesh] OR "Health Services Administration"[Mesh] OR "Delivery of Health Care"[Mesh] OR "health governance"[Title/Abstract] OR "health system governance"[Title/Abstract] OR "health service delivery"[Title/Abstract] OR "healthcare delivery"[Title/Abstract] OR ( (coordinat*[Title/Abstract] OR "care coordination"[Title/Abstract] OR "service coordination"[Title/Abstract] OR harmoniz*[Title/Abstract] OR harmonis*[Title/Abstract] OR integrat*[Title/Abstract] OR "integrated care"[Title/Abstract] OR "service integration"[Title/Abstract]) AND (health[Title/Abstract] OR care[Title/Abstract] OR service*[Title/Abstract] OR delivery[Title/Abstract] OR governance[Title/Abstract]) ) ) AND ( "fragile state"[Title/Abstract] OR "fragile setting"[Title/Abstract] OR "conflict-affected"[Title/Abstract] OR conflict[Title/Abstract] OR devolved[Title/Abstract] OR federalized[Title/Abstract] OR federalis*[Title/Abstract] ) AND ( Comoros OR Ethiopia OR Iraq OR Libya OR Nepal OR Nigeria OR "Papua New Guinea" OR Somalia OR Syria OR Venezuela OR Palestine OR Yemen OR Kenya OR Myanmar OR Micronesia) |
| Embase  2010-2025 | ('health governance':ti,ab,kw OR 'health system governance':ti,ab,kw OR 'health service delivery':ti,ab,kw OR 'healthcare delivery':ti,ab,kw OR 'care coordination':ti,ab,kw OR 'service coordination':ti,ab,kw OR coordinat*:ti,ab,kw OR harmoniz*:ti,ab,kw OR harmonis*:ti,ab,kw OR integrat*:ti,ab,kw OR 'integrated care':ti,ab,kw OR 'service integration':ti,ab,kw) AND ('fragile state':ti,ab,kw OR 'fragile setting':ti,ab,kw OR 'conflict-affected':ti,ab,kw OR conflict:ti,ab,kw OR devolved:ti,ab,kw OR federalized:ti,ab,kw OR federalis*:ti,ab,kw) AND (comoros:ti,ab,kw OR ethiopia:ti,ab,kw OR iraq:ti,ab,kw OR libya:ti,ab,kw OR nepal:ti,ab,kw OR nigeria:ti,ab,kw OR 'papua new guinea':ti,ab,kw OR somalia:ti,ab,kw OR syria:ti,ab,kw OR venezuela:ti,ab,kw OR palestine:ti,ab,kw OR yemen:ti,ab,kw OR kenya:ti,ab,kw OR myanmar:ti,ab,kw OR micronesia:ti,ab,kw) |
| Web of Science  2010-2025 | (TS=("health governance") OR  TS=("health system governance") OR  TS=("health service delivery") OR  TS=("healthcare delivery") OR  TS=(("care coordination" OR "service coordination" OR coordinat* OR harmoniz* OR harmonis* OR integrat* OR "integrated care" OR "service integration") AND (health OR care OR service* OR delivery OR governance)))  AND  (TS=("fragile state") OR  TS=("fragile setting") OR  TS=("conflict-affected") OR  TS=(conflict) OR  TS=(devolved) OR  TS=(federalized) OR  TS=(federalis*))  AND  (TS=(Comoros) OR  TS=(Ethiopia) OR  TS=(Iraq) OR  TS=(Libya) OR  TS=(Nepal) OR  TS=(Nigeria) OR  TS=("Papua New Guinea") OR  TS=(Somalia) OR  TS=(Syria) OR  TS=(Venezuela) OR  TS=(Palestine) OR  TS=(Yemen) OR  TS=(Kenya) OR  TS=(Myanmar) OR  TS=(Micronesia)) |
| Google scholar  2010-2025 | ("health governance" OR "health system governance" OR "health service delivery" OR "healthcare delivery")  AND ("coordination" OR "harmonization" OR "coordinated health services" OR "harmonized health services" OR "coordinated healthcare delivery" OR "harmonized healthcare delivery")  AND ("fragile setting" OR "fragile state" OR "conflict-affected setting" OR "conflict-affected state" OR "federalized" OR "devolved" OR "multi-jurisdictional" OR "jurisdictional interplay" OR "cross-border health" OR "limited statehood" OR "mixed governance")  AND (Comoros OR Ethiopia OR Iraq OR Libya OR Micronesia OR Nepal OR Nigeria OR "Papua New Guinea" OR Somalia OR Syria OR Venezuela OR Palestine OR Yemen OR Kenya OR Myanmar) |

**Annex 2**: Summary overview of studies included in the review

| # | Author | Title | Year | Type of document | Country of Reference | Type of governance |
| --- | --- | --- | --- | --- | --- | --- |
| 1 | Paterson | Health system governance cooperation with unrecognised health authorities: a political economy analysis in Afghanistan and Northwest Syria | 2025 | Journal article | Syria | Multi-jurisdictional |
| 2 | Mbachu | Strengthening intersectoral collaboration for adolescent sexual and reproductive health: a community-embedded intervention in Ebonyi state, Nigeria | 2025 | Journal article | Nigeria | Federal |
| 3 | Korir | Mapping the drivers of multisectoral nutrition governance and its link to nutrition outcomes in Kenya: a qualitative inquiry | 2025 | Journal article | Kenya | Devolved |
| 4 | WHO | Governance of the private sector in fragile, conflict-affected and vulnerable settings (Clearing house briefs series) | 2024 | Report | Somalia; Yemen; Iraq | Iraq: Multi-jurisdictional  Somalia: Federal  Yemen: Multi-jurisdictional |
| 5 | Baatz | Vaccination governance in protracted conflict settings: the case of northwest Syria | 2024 | Journal article | Syria | Multi-jurisdictional |
| 6 | Alkhalil | Capturing sources of health system legitimacy in fragmented conflict zones under different governance models: a case study of northwest Syria | 2024 | Journal article | Syria | Multi-jurisdictional |
| 7 | Than | Assessing the role of non-state actors in health service delivery and health system resilience in Myanmar | 2024 | Journal article | Myanmar | Multi-jurisdictional |
| 8 | Nyawira | Examining the influence of health sector coordination on the efficiency of county health systems in Kenya | 2023 | Journal article | Kenya | Devolved |
| 9 | Witter | Evolution and lessons from an integrated service delivery network in North West Syria | 2023 | Journal article | Syria | Multi-jurisdictional |
| 10 | Al-Abdulla | Health system recovery in Northwest Syria: challenges and operationalization | 2023 | Journal article | Syria | Multi-jurisdictional |
| 11 | Rodriguez | Political economy analysis of subnational health management in Kenya, Malawi and Uganda | 2023 | Journal article | Kenya | Devolved |
| 12 | Al Aref | Health system governance assessment in protracted crisis settings: Northwest Syria | 2023 | Journal article | Syria | Multi-jurisdictional |
| 13 | Gebremeskel | Unpacking the challenges of fragmentation in community-based MNCH and the health system in rural Ethiopia: a qualitative study | 2023 | Journal article | Ethiopia | Federal |
| 14 | Afesha | Sectoral intergovernmental relations in Ethiopia federation: normative and empirical considerations | 2023 | Journal article | Ethiopia | Federal |
| 15 | Brennan | The impact of decentralisation on health systems in fragile and post-conflict countries: a narrative synthesis of six case studies in the Indo-Pacific | 2023 | Journal article | Nepal; Myanmar | Nepal: Federal  Myanmar: Multi-jurisdictional |
| 16 | Gadisa | Decentralization and Health Sector Reform: Lessons from Ethiopia | 2022 | Journal article | Ethiopia | Federal |
| 17 | Hiwot | Multi-Stakeholder Partnerships (MSPs) for Health Service Delivery in Ethiopia | 2021 | Journal article | Ethiopia | Federal |
| 18 | Dureab | Forms of Health System Fragmentation During Conflict: The Case of Yemen | 2021 | Journal article | Yemen | Multi-jurisdictional |
| 19 | Yashchenko | Real-life approaches employed by recognized governments to ensure health coverage of citizens in fragile settings (comparative policy analysis) | 2021 | Journal article | Somalia; Palestine; | Somalia: Federal  Palestine: Multi-jurisdictional |
| 20 | Biesty | Conflict affected, parallel health systems: challenges to collaboration between ethnic and government health systems in Kayin State, Myanmar | 2021 | Journal article | Myanmar | Multi-jurisdictional |
| 21 | Thuku | Coordinating health workforce management in a devolved context: Lessons from Kenya | 2020 | Journal article | Kenya | Devolved |
| 22 | Ayele | Multi-sectoral nutrition policy and programme design, coordination and implementation in Ethiopia | 2020 | Report | Ethiopia | Federal |
| 23 | Abu El Kheir-Mataria | Enhancing Ministry of Health-NGOs Partnership in Palestine for Effective Health Services Delivery: Advancing Towards Universal Health Coverage | 2019 | Report | Palestine | Multi-jurisdictional |
| 24 | Duclos | Localisation and cross-border assistance to deliver humanitarian health services in North-West Syria: a qualitative inquiry | 2019 | Journal article | Syria | Multi-jurisdictional |
| 25 | Bekelle | Implementing effective leadership and coordination systems for better health outcomes in Ethiopia (2004-2016) | 2019 | Journal article | Ethiopia | Federal |
| 26 | Arda | Governance in areas of limited statehood: the NGOization of Palestine | 2019 | Journal article | Palestine | Multi-jurisdictional |
| 27 | Tang | Health system strengthening in post-conflict ethnic regions of Northeastern Myanmar: a qualitative study | 2019 | Journal article | Myanmar | Multi-jurisdictional |
| 28 | Douadari | Perspectives on rebuilding health system governance in opposition-controlled Syria: a qualitative study | 2019 | Journal article | Syria | Multi-jurisdictional |
| 29 | Alzoubi | Reinventing State: Health Governance in Syrian Opposition-Held Areas | 2019 | Report | Syria | Multi-jurisdictional |
| 30 | Gebre-Mariam | Governance lessons from an interorganizational health information system implementation in Ethiopia | 2018 | Journal article | Ethiopia | Federal |
| 31 | Teshome | Aid, ownership, and coordination in the health sector in Ethiopia | 2018 | Journal article | Ethiopia | Federal |
| 32 | Thapa | Implementing federalism in the health system of Nepal: opportunities and challenges | 2018 | Journal article | Nepal | Federal |
| 33 | Manya | Understanding the effects of decentralization on health information systems in developing countries: a case of devolution in Kenya | 2018 | Conference Preceeding | Kenya | Devolved |
| 34 | Eboreime | Evaluating the sub-national fidelity of national initiatives in decentralized health systems: Integrated Primary Health Care Governance in Nigeria | 2017 | Journal article | Nigeria | Federal |
| 35 | Regmi | Need of the Ministry of Health in Federal Democratic Republic of Nepal | 2017 | Journal article | Nepal | Federal |
| 36 | Ochieng | Who is responsible? Local government and accountability for service delivery in Kenya's devolved health sector | 2017 | Journal article | Kenya | Devolved |
| 37 | Odutolu | Putting institutions at the center of primary health care reforms: Experience from implementation in three states in Nigeria | 2016 | Journal article | Nigeria | Federal |
| 38 | McKenzie | Creating the foundation for health system resilience in Northern Nigeria | 2016 | Journal article | Nigeria | Federal |
| 39 | Schaferhoff | External actors and the provision of public health services in Somalia | 2014 | Journal article | Somalia | Federal |
